# Supplementary material for: Avelumab in patients with previously treated metastatic Merkel cell carcinoma: long-term data and biomarker analyses from the single-arm phase 2 JAVELIN Merkel 200 trial
Source: PubMed Central journal article supplement (PMC7239697; doi:10.1136/jitc-2020-000674), 2020-05-15

**SUPPLEMENTARY MATERIAL****Table S1.** Baseline characteristics

|                                                    | <b>N=88</b>  |
|----------------------------------------------------|--------------|
| Median age (range), years                          | 72.5 (33-88) |
| Sex, n (%)                                         |              |
| Male                                               | 65 (73.9)    |
| Female                                             | 23 (26.1)    |
| ECOG PS, n (%)                                     |              |
| 0                                                  | 49 (55.7)    |
| 1                                                  | 39 (44.3)    |
| Site of primary tumor, n (%)                       |              |
| Skin                                               | 67 (76.1)    |
| Nonskin <sup>a</sup>                               | 14 (15.9)    |
| Missing                                            | 7 (8.0)      |
| Visceral disease at study entry, n (%)             |              |
| Present                                            | 47 (53.4)    |
| Absent                                             | 41 (46.6)    |
| No. of prior systemic anticancer treatments, n (%) |              |
| 1                                                  | 52 (59.1)    |
| 2                                                  | 25 (28.4)    |
| ≥3                                                 | 11 (12.5)    |
| Tumor PD-L1 status, n (%) <sup>b</sup>             |              |
| Positive                                           | 57 (64.8)    |
| Negative                                           | 16 (18.2)    |
| Not evaluable                                      | 15 (17.0)    |
| Tumor MCPyV status, n (%)                          |              |
| Positive                                           | 46 (52.3)    |
| Negative                                           | 31 (35.2)    |
| Not evaluable                                      | 11 (12.5)    |

<sup>a</sup> Nonskin sites include lymph node (n=12 [13.6%]) and other sites (cheek mucosa and rectosigmoid junction; n=2 [2.3%]).

<sup>b</sup> PD-L1+ status was defined as expression on  $\geq 1\%$  of tumor cells, assessed using a Dako PD-L1 73-10 IHC assay.

ECOG PS, Eastern Cooperative Oncology Group performance status; MCPyV, Merkel cell polyomavirus; PD-L1, programmed death-ligand 1.

**Table S2.** Summary of subsequent therapy received based on best overall response to avelumab

| Avelumab therapy (N=88)            |                         | Subsequent therapy <sup>a</sup>      |                         |                                                                                                                                                             |                                                              |                                                                                |                                                                                                                           |
|------------------------------------|-------------------------|--------------------------------------|-------------------------|-------------------------------------------------------------------------------------------------------------------------------------------------------------|--------------------------------------------------------------|--------------------------------------------------------------------------------|---------------------------------------------------------------------------------------------------------------------------|
| Best overall response <sup>b</sup> | Patients, n             | Any reported therapy, n <sup>a</sup> | Radiotherapy or surgery | Chemotherapy agents                                                                                                                                         | Immune checkpoint inhibitors <sup>a</sup>                    | Other systemic therapy                                                         | Investigator-reported patient status at data cutoff                                                                       |
| Complete response                  | 10                      | 3                                    | Radiotherapy            | –                                                                                                                                                           | –                                                            | –                                                                              | Alive ≈12 months later                                                                                                    |
|                                    |                         |                                      | Radiotherapy            | Carboplatin plus etoposide                                                                                                                                  | Nivolumab plus ipilimumab followed by nivolumab alone        | –                                                                              | Alive ≈3 years later                                                                                                      |
|                                    |                         |                                      | Surgery                 | Carboplatin plus etoposide                                                                                                                                  | –                                                            | –                                                                              | Died within 2 months of starting chemotherapy                                                                             |
| Partial response                   | 19                      | 3                                    | Surgery                 | –                                                                                                                                                           | –                                                            | –                                                                              | Alive >3 years later                                                                                                      |
|                                    |                         |                                      | Radiotherapy            | –                                                                                                                                                           | Pembrolizumab                                                | Octreotide and pazopanib                                                       | Alive ≈2 year later                                                                                                       |
|                                    |                         |                                      | –                       | Cyclophosphamide and capecitabine                                                                                                                           | –                                                            | –                                                                              | Responded to chemotherapy but died ≈1 year later                                                                          |
| No objective response              | 59 (SD=9; PD=32; NE=18) | 21 (SD=2; PD=15; NE=4)               | 8 received radiotherapy | 10 patients; agents included cisplatin, etoposide, topotecan, docetaxel, cyclophosphamide-doxorubicin, vincristine, capecitabine, and pegylated doxorubicin | 5 patients; agents received were nivolumab and pembrolizumab | 6 patients; agents included everolimus, somatostatin, sunitinib, and pazopanib | 4 patients responded to chemotherapy; no other responses were recorded; 20 patients died; 1 patient was lost to follow-up |

<sup>a</sup> Excluding avelumab treatment.

<sup>b</sup> Tumor response according to RECIST 1.1 reported by independent review committee.

NE, not evaluable; PD, progressive disease; RECIST, Response Evaluation Criteria in Solid Tumors; SD, stable disease.

**Table S3.** Treatment-related adverse events and infusion-related reactions (N=88)

|                                                  | <b>Any grade, n (%)</b> | <b>Grade <math>\geq 3</math>, n (%)</b> |
|--------------------------------------------------|-------------------------|-----------------------------------------|
| Any treatment-related adverse event <sup>a</sup> | 68 (77.3)               | 10 (11.4)                               |
| Fatigue                                          | 22 (25.0)               | 0                                       |
| Diarrhea                                         | 11 (12.5)               | 0                                       |
| Nausea                                           | 11 (12.5)               | 0                                       |
| Rash                                             | 8 (9.1)                 | 0                                       |
| Asthenia                                         | 7 (8.0)                 | 0                                       |
| Decreased appetite                               | 7 (8.0)                 | 0                                       |
| Hypothyroidism                                   | 6 (6.8)                 | 1 (1.1)                                 |
| Pruritus                                         | 6 (6.8)                 | 0                                       |
| Arthralgia                                       | 5 (5.7)                 | 0                                       |
| Aspartate aminotransferase increased             | 5 (5.7)                 | 0                                       |
| Blood creatine phosphokinase increased           | 5 (5.7)                 | 3 (3.4)                                 |
| Chills                                           | 5 (5.7)                 | 0                                       |
| Rash maculopapular                               | 5 (5.7)                 | 0                                       |
| Alanine aminotransferase increased               | 4 (4.5)                 | 1 (1.1)                                 |
| Lymphopenia                                      | 3 (3.4)                 | 2 (2.3)                                 |
| Gamma glutamyltransferase increased              | 2 (2.3)                 | 1 (1.1)                                 |
| Autoimmune disorder                              | 1 (1.1)                 | 1 (1.1)                                 |
| Blood cholesterol increased                      | 1 (1.1)                 | 1 (1.1)                                 |
| Ileus                                            | 1 (1.1)                 | 1 (1.1)                                 |
| Neutrophil count decreased                       | 1 (1.1)                 | 1 (1.1)                                 |
| Thrombocytopenia                                 | 1 (1.1)                 | 1 (1.1)                                 |
| Transaminases increased                          | 1 (1.1)                 | 1 (1.1)                                 |
| Any infusion-related reaction <sup>b</sup>       | 19 (21.6)               | 0                                       |

Shown are individual treatment-related adverse events of any grade that occurred in >5% of patients and grade  $\geq 3$  treatment-related adverse events that occurred in any patient.

<sup>a</sup> The incidence of treatment-related infusion-related reaction based on the single Medical Dictionary for Regulatory Activities Preferred Term is not listed.

<sup>b</sup> Composite term, which includes adverse events categorized as infusion-related reaction,

anaphylactic reaction, drug hypersensitivity, type I hypersensitivity, or hypersensitivity reaction that occurred on the day of or day after infusion, in addition to signs/symptoms of infusion-related reaction that occurred on the day of infusion (during or after the infusion) that resolved on the day of onset or next day; includes adverse events classified by investigators as related or unrelated to treatment.

**Table S4.** Immune-related adverse events (N=88)

|                                      | <b>Any grade, n (%)</b> | <b>Grade ≥3, n (%)</b> |
|--------------------------------------|-------------------------|------------------------|
| Any immune-related adverse event     | 19 (21.6)               | 4 (4.5)                |
| Hypothyroidism                       | 5 (5.7)                 | 1 (1.1)                |
| Rash                                 | 5 (5.7)                 | 0                      |
| Diarrhea                             | 2 (2.3)                 | 0                      |
| Erythema                             | 2 (2.3)                 | 0                      |
| Abnormal thyroid function test       | 1 (1.1)                 | 0                      |
| Alanine aminotransferase increased   | 1 (1.1)                 | 1 (1.1)                |
| Aspartate aminotransferase increased | 1 (1.1)                 | 0                      |
| Autoimmune disorder                  | 1 (1.1)                 | 1 (1.1)                |
| Autoimmune colitis                   | 1 (1.1)                 | 0                      |
| Hemophagocytic lymphohistiocytosis   | 1 (1.1)                 | 0                      |
| Hyperthyroidism                      | 1 (1.1)                 | 0                      |
| Pruritus                             | 1 (1.1)                 | 0                      |
| Rash maculopapular                   | 1 (1.1)                 | 0                      |
| Transaminases increased              | 1 (1.1)                 | 1 (1.1)                |
| Tubulointerstitial nephritis         | 1 (1.1)                 | 0                      |

**Table S5.** Differentially expressed gene sets between responders and non-responders.

| Rank                      | Gene pathway                                             | P value     | Adjusted P value | Enrichment score | Normalized enrichment score |
|---------------------------|----------------------------------------------------------|-------------|------------------|------------------|-----------------------------|
| <b>HALLMARK</b>           |                                                          |             |                  |                  |                             |
| 1                         | HALLMARK_DNA_REPAIR                                      | 0.000197668 | 0.000460719      | -0.415128008     | -2.056632646                |
| 2                         | HALLMARK_COAGULATION                                     | 0.000198138 | 0.000460719      | 0.444763832      | 2.168012536                 |
| 3                         | HALLMARK_OXIDATIVE_PHOSPHORYLATION                       | 0.000199283 | 0.000460719      | -0.447335279     | -2.326239874                |
| 4                         | HALLMARK_TGF_BETA_SIGNALING                              | 0.000199442 | 0.000460719      | 0.504282201      | 2.107973213                 |
| 5                         | HALLMARK_EPITHELIAL_MESENCHYMAL_TRANSITION               | 0.00019988  | 0.000460719      | 0.480098659      | 2.513865083                 |
| 6                         | HALLMARK_IL2_STAT5_SIGNALING                             | 0.00019988  | 0.000460719      | 0.383358989      | 2.007322367                 |
| 7                         | HALLMARK_E2F_TARGETS                                     | 0.000200321 | 0.000460719      | -0.424628781     | -2.203893626                |
| 8                         | HALLMARK_MYC_TARGETS_V1                                  | 0.000200321 | 0.000460719      | -0.603764626     | -3.133638295                |
| 9                         | HALLMARK_INTERFERON_GAMMA_RESPONSE                       | 0.000200602 | 0.000460719      | 0.504527261      | 2.635977846                 |
| 10                        | HALLMARK_INFLAMMATORY_RESPONSE                           | 0.000201045 | 0.000460719      | 0.411378262      | 2.146191907                 |
| 11                        | HALLMARK_ALLOGRAFT_REJECTION                             | 0.000201045 | 0.000460719      | 0.427657346      | 2.231121136                 |
| 12                        | HALLMARK_IL6_JAK_STAT3_SIGNALING                         | 0.000201086 | 0.000460719      | 0.454104261      | 2.065831199                 |
| 13                        | HALLMARK_MYC_TARGETS_V2                                  | 0.000201288 | 0.000460719      | -0.69635539      | -2.914081451                |
| 14                        | HALLMARK_UV_RESPONSE_DN                                  | 0.000201898 | 0.000460719      | 0.443026074      | 2.212918524                 |
| 15                        | HALLMARK_COMPLEMENT                                      | 0.000201939 | 0.000460719      | 0.514428618      | 2.671397469                 |
| 16                        | HALLMARK_INTERFERON_ALPHA_RESPONSE                       | 0.000202716 | 0.000460719      | 0.524541307      | 2.429599134                 |
| <b>Canonical pathways</b> |                                                          |             |                  |                  |                             |
| 1                         | REACTOME_METABOLISM_OF_PROTEINS                          | 0.00019216  | 0.002428629      | -0.478187531     | -2.7025933                  |
| 2                         | REACTOME_MRNA_PROCESSING                                 | 0.00019516  | 0.002428629      | -0.424746945     | -2.120428309                |
| 3                         | REACTOME_METABOLISM_OF_RNA                               | 0.000195313 | 0.002428629      | -0.559566834     | -2.995237483                |
| 4                         | REACTOME_TRANSLATION                                     | 0.00019558  | 0.002428629      | -0.740609769     | -3.672384455                |
| 5                         | REACTOME_METABOLISM_OF_MRNA                              | 0.000195656 | 0.002428629      | -0.571411855     | -2.979479908                |
| 6                         | REACTOME_PROCESSING_OF_CAPPED_INTRON_CONTAINING_PRE_MRNA | 0.000197006 | 0.002428629      | -0.455673018     | -2.231505359                |
| 7                         | REACTOME_INFLUENZA_LIFE_CYCLE                            | 0.000197278 | 0.002428629      | -0.68824442      | -3.37141663                 |
| 8                         | KEGG_SPLICEOSOME                                         | 0.000197394 | 0.002428629      | -0.434990634     | -2.101174493                |
| 9                         | REACTOME_NONSENSE_MEDIATED                               | 0.000197394 | 0.002428629      | -0.763746669     | -3.600542435                |



|    |                                                                            |             |             |              |              |
|----|----------------------------------------------------------------------------|-------------|-------------|--------------|--------------|
|    | _DECAY_ENHANCED_BY_THE_EXON_JUNCTION_COMPLEX                               |             |             |              |              |
| 10 | REACTOME_SRP_DEPENDENT_COTRANSLATIONAL_PROTEIN_TARGETING_TO_MEMBRANE       | 0.000197824 | 0.002428629 | -0.759271896 | -3.591056302 |
| 11 | BIOCARTA_TH1TH2_PATHWAY                                                    | 0.000197863 | 0.002428629 | 0.716116832  | 2.169325643  |
| 12 | REACTOME_TCA_CYCLE_AND_RESPIRATORY_ELECTRON_TRANSPORT                      | 0.00019802  | 0.002428629 | -0.502135659 | -2.4010114   |
| 13 | BIOCARTA_NKT_PATHWAY                                                       | 0.000198177 | 0.002428629 | 0.690424832  | 2.37756372   |
| 14 | PID_LYMPH_ANGIOGENESIS_PATHWAY                                             | 0.000198177 | 0.002428629 | 0.667236665  | 2.297712387  |
| 15 | REACTOME_MRNA_SPLICING                                                     | 0.000198216 | 0.002428629 | -0.4786335   | -2.251550708 |
| 16 | KEGG_OXIDATIVE_PHOSPHORYLATION                                             | 0.000198491 | 0.002428629 | -0.47162547  | -2.243338859 |
| 17 | PID_AVB3_INTEGRIN_PATHWAY                                                  | 0.000198491 | 0.002428629 | 0.530411574  | 2.357838096  |
| 18 | REACTOME_G_ALPHA1213_SIGNALLING_EVENTS                                     | 0.000198491 | 0.002428629 | 0.50392102   | 2.240079659  |
| 19 | KEGG_DNA_REPLICATION                                                       | 0.00019857  | 0.002428629 | -0.683602941 | -2.555174011 |
| 20 | REACTOME_FORMATION_OF_THE_TERNARY_COMPLEX_AND_SUBSEQUENTLY_THE_43S_COMPLEX | 0.000198649 | 0.002428629 | -0.795401936 | -3.189087007 |
| 21 | REACTOME_3_UTR_MEDIATED_TRANSLATIONAL_REGULATION                           | 0.000198728 | 0.002428629 | -0.802572358 | -3.764679226 |
| 22 | KEGG_ALLOGRAFT_REJECTION                                                   | 0.000198768 | 0.002428629 | 0.6943078    | 2.505486813  |
| 23 | REACTOME_MITOCHONDRIAL_PROTEIN_IMPORT                                      | 0.000198768 | 0.002428629 | -0.639662913 | -2.591950741 |
| 24 | REACTOME_INFLUENZA_VIRAL_RNA_TRANSCRIPTION_AND_REPLICATION                 | 0.000199084 | 0.002428629 | -0.781105699 | -3.643800767 |
| 25 | BIOCARTA_MCALPAIN_PATHWAY                                                  | 0.000199164 | 0.002428629 | 0.623346924  | 2.095985925  |
| 26 | REACTOME_RESPIRATORY_ELECTRON_TRANSPORT                                    | 0.000199203 | 0.002428629 | -0.533873359 | -2.290658837 |
| 27 | KEGG_RIBOSOME                                                              | 0.000199243 | 0.002428629 | -0.808036226 | -3.661784274 |
| 28 | KEGG_HEMATOPOIETIC_CELL_LINEAGE                                            | 0.000199283 | 0.002428629 | 0.495160832  | 2.209006628  |
| 29 | PID_IL27_PATHWAY                                                           | 0.000199442 | 0.002428629 | 0.609711084  | 2.07040902   |
| 30 | REACTOME_INTERFERON_GAMMA_SIGNALING                                        | 0.000199442 | 0.002428629 | 0.580905213  | 2.43791162   |
| 31 | KEGG_GRAFT_VERSUS_HOST_DISEASE                                             | 0.000199641 | 0.002428629 | 0.629004019  | 2.324186963  |
| 32 | REACTOME_PEPTIDE_CHAIN_ELONGATION                                          | 0.000199641 | 0.002428629 | -0.817409755 | -3.694720109 |

|    |                                                                                                                           |             |             |              |              |
|----|---------------------------------------------------------------------------------------------------------------------------|-------------|-------------|--------------|--------------|
| 33 | REACTOME_IL_3_5_AND_GM-CSF_SIGNALING                                                                                      | 0.000199641 | 0.002428629 | 0.523697701  | 2.016587549  |
| 34 | PID_INTEGRIN2_PATHWAY                                                                                                     | 0.000199681 | 0.002428629 | 0.604209218  | 2.139144877  |
| 35 | REACTOME_INTEGRIN_CELL_SURFACE_INTERACTIONS                                                                               | 0.00019976  | 0.002428629 | 0.527056536  | 2.367069504  |
| 36 | REACTOME_TRNA_AMINOACYLATION                                                                                              | 0.00019984  | 0.002428629 | -0.537688971 | -2.098989198 |
| 37 | PID_FAK_PATHWAY                                                                                                           | 0.00019988  | 0.002428629 | 0.53382316   | 2.248031234  |
| 38 | REACTOME_ACTIVATION_OF_THE_MRNA_UPON_BINDING_OF_THE_CAP_BINDING_COMPLEX_AND_EIF5_AND_SUBSEQUENT_BINDING_TO_43S            | 0.00019988  | 0.002428629 | -0.787961867 | -3.256592689 |
| 39 | REACTOME_RESPIRATORY_ELECTRON_TRANSPORT_ATP_SYNTHESIS_BY_CHEMIOSMOTIC_COUPLING_AND_HEAT_PRODUCTION_BY_UNCOUPLING_PROTEINS | 0.00019988  | 0.002428629 | -0.52070532  | -2.335608839 |
| 40 | NABA_BASEMENT_MEMBRANES                                                                                                   | 0.00019988  | 0.002428629 | 0.586705944  | 2.270338305  |
| 41 | KEGG_TYPE_I_DIABETES_MELLITUS                                                                                             | 0.00019992  | 0.002428629 | 0.561249149  | 2.128480389  |
| 42 | PID_INTEGRIN1_PATHWAY                                                                                                     | 0.00020008  | 0.002428629 | 0.585528168  | 2.532211003  |
| 43 | KEGG_BASE_EXCISION_REPAIR                                                                                                 | 0.00020028  | 0.002428629 | -0.573882394 | -2.110741572 |
| 44 | KEGG_TGF_BETA_SIGNALING_PATHWAY                                                                                           | 0.00020028  | 0.002428629 | 0.477643361  | 2.169167367  |
| 45 | KEGG_AUTOIMMUNE_THYROID_DISEASE                                                                                           | 0.00020028  | 0.002428629 | 0.67062933   | 2.43635355   |
| 46 | KEGG_LEISHMANIA_INFECTION                                                                                                 | 0.000200361 | 0.002428629 | 0.544903459  | 2.365486029  |
| 47 | REACTOME_CYTOSOLIC_TRNA_AMINOACYLATION                                                                                    | 0.000200481 | 0.002428629 | -0.636033718 | -2.164682128 |
| 48 | KEGG_ECM_RECEPTOR_INTERACTION                                                                                             | 0.000200521 | 0.002428629 | 0.518252804  | 2.342513809  |
| 49 | REACTOME_DNA_STRAND_ELONGATION                                                                                            | 0.000200723 | 0.002428629 | -0.701977021 | -2.497948499 |
| 50 | PID_CXCR4_PATHWAY                                                                                                         | 0.000200844 | 0.002428629 | 0.436336186  | 2.044197909  |
| 51 | REACTOME_TOLL_RECEPTOR_CASCADES                                                                                           | 0.000200965 | 0.002428629 | 0.427039261  | 2.031453624  |
| 52 | REACTOME_EXTENSION_OF_TELOMERES                                                                                           | 0.000200965 | 0.002428629 | -0.673667957 | -2.334311605 |
| 53 | REACTOME_SIGNALING_BY_ILS                                                                                                 | 0.000201167 | 0.002428629 | 0.504513442  | 2.367854856  |
| 54 | REACTOME_INTERFERON_ALPHA_BETA_SIGNALING                                                                                  | 0.000201167 | 0.002428629 | 0.507011564  | 2.053460873  |
| 55 | REACTOME_IMMUNOREGULATORY_INTERACTIONS_BETWEEN_A_LYMPHOID_AND_A_NON_LYMPHOID_CELL                                         | 0.000201288 | 0.002428629 | 0.511234307  | 2.156771341  |
| 56 | KEGG_COMPLEMENT_AND_COAGULATION                                                                                           | 0.00020145  | 0.002428629 | 0.519220081  | 2.198203601  |

|    |                                                        |             |             |              |              |
|----|--------------------------------------------------------|-------------|-------------|--------------|--------------|
|    | CASCADES                                               |             |             |              |              |
| 57 | KEGG_NATURAL_KILLER_CELL_MEDIATED_CYTOTOXICITY         | 0.00020145  | 0.002428629 | 0.444060676  | 2.114916052  |
| 58 | KEGG_TOLL_LIKE_RECEPTOR_SIGNALING_PATHWAY              | 0.000201491 | 0.002428629 | 0.471528624  | 2.152109725  |
| 59 | PID_SYNDECAN_1_PATHWAY                                 | 0.000201572 | 0.002428629 | 0.591177589  | 2.360320923  |
| 60 | KEGG_CELL_ADHESION_MOLECULES_CAMS                      | 0.000202593 | 0.002428629 | 0.472488755  | 2.297982628  |
| 61 | KEGG_CYTOKINE_CYTOKINE_RECEPTOR_INTERACTION            | 0.000202716 | 0.002428629 | 0.432329563  | 2.285437777  |
| 62 | KEGG_JAK_STAT_SIGNALING_PATHWAY                        | 0.000202799 | 0.002428629 | 0.469223201  | 2.262158489  |
| 63 | REACTOME_INNATE_IMMUNE_SYSTEM                          | 0.00020429  | 0.002428629 | 0.396035767  | 2.076510107  |
| 64 | REACTOME_PLATELET_ACTIVATION_SIGNALING_AND_AGGREGATION | 0.000205128 | 0.002428629 | 0.421544103  | 2.18321929   |
| 65 | KEGG_FOCAL_ADHESION                                    | 0.000205339 | 0.002428629 | 0.410474678  | 2.132331484  |
| 66 | REACTOME_HEMOSTASIS                                    | 0.00020829  | 0.002428629 | 0.364182633  | 2.076204388  |
| 67 | REACTOME_SEMA4D_IN_SEMAPHORIN_SIGNALING                | 0.000397535 | 0.00382449  | 0.559296847  | 2.018284795  |
| 68 | REACTOME_METABOLISM_OF_NON_CODING_RNA                  | 0.000397772 | 0.00382449  | -0.52005868  | -2.095942393 |
| 69 | PID_INTEGRIN_CS_PATHWAY                                | 0.000397931 | 0.00382449  | 0.58139786   | 2.02307392   |
| 70 | REACTOME_NOD1_2_SIGNALING_PATHWAY                      | 0.000398406 | 0.00382449  | 0.572598612  | 2.04481269   |
| 71 | PID_INTEGRIN3_PATHWAY                                  | 0.000399122 | 0.00382449  | 0.52660652   | 2.075985385  |
| 72 | PID_TCPTP_PATHWAY                                      | 0.00040016  | 0.00382449  | 0.531531303  | 2.082235242  |
| 73 | KEGG_RNA_POLYMERASE                                    | 0.000401445 | 0.00382449  | -0.576137245 | -2.050154241 |
| 74 | REACTOME_BASE_EXCISION_REPAIR                          | 0.000601805 | 0.005213431 | -0.628341356 | -2.003157361 |
| 75 | NABA_COLLAGENS                                         | 0.00060241  | 0.005213431 | 0.511876411  | 2.023622852  |
| 76 | REACTOME_LAGGING_STRAND_SYNTHESIS                      | 0.0006035   | 0.005213431 | -0.643059034 | -2.022357217 |
| 77 | BIOCARTA_UCALPAIN_PATHWAY                              | 0.001192606 | 0.008723965 | 0.646166142  | 2.024635975  |

A positive enrichment score identifies gene sets enriched in responders (PR/CR), a negative enrichment score identifies gene sets enriched in nonresponders (SD/PD).

**Figure S1.** Study profile after  $\geq 44$ -months of follow-up.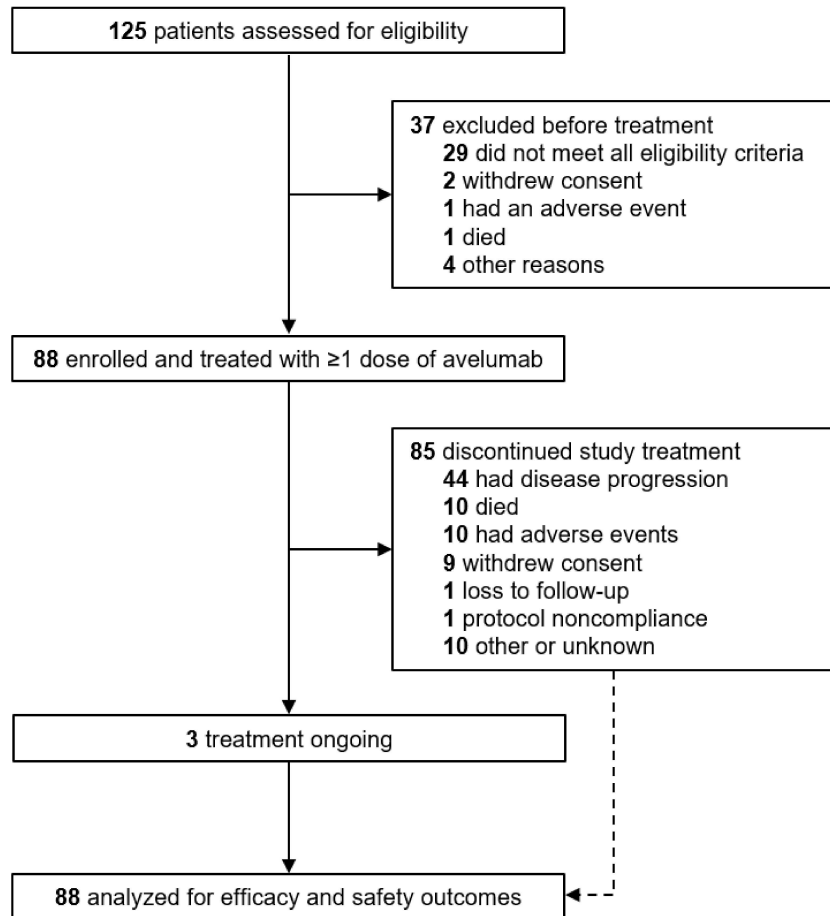

**Figure S2.** Best change from baseline in target lesions in evaluable patients (patients with a baseline tumor assessment and  $\geq 1$  on-study tumor assessment; n=65).

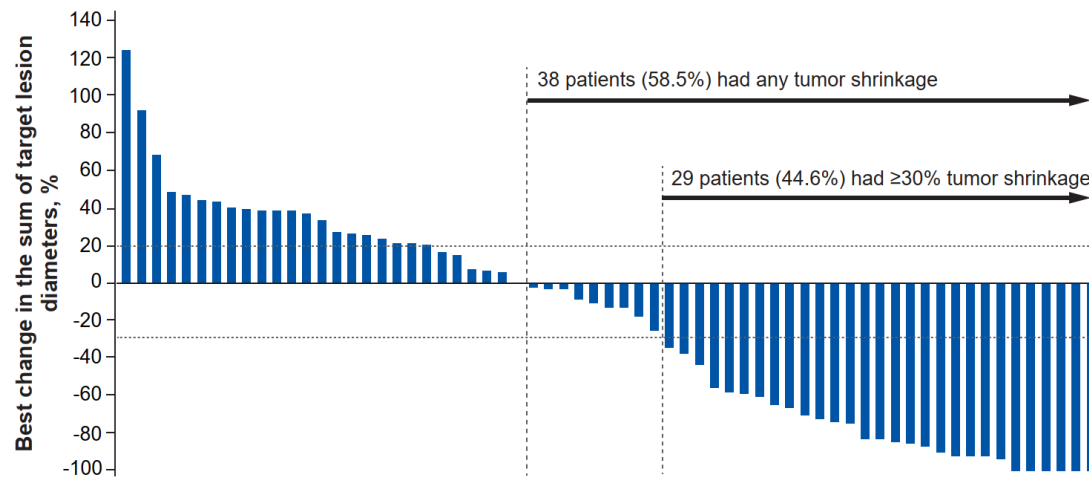

**Figure S3.** Change from baseline in target lesions over time by tumor PD-L1 expression in evaluable patients who had a confirmed response to avelumab (n=26). PD-L1, programmed death-ligand 1.

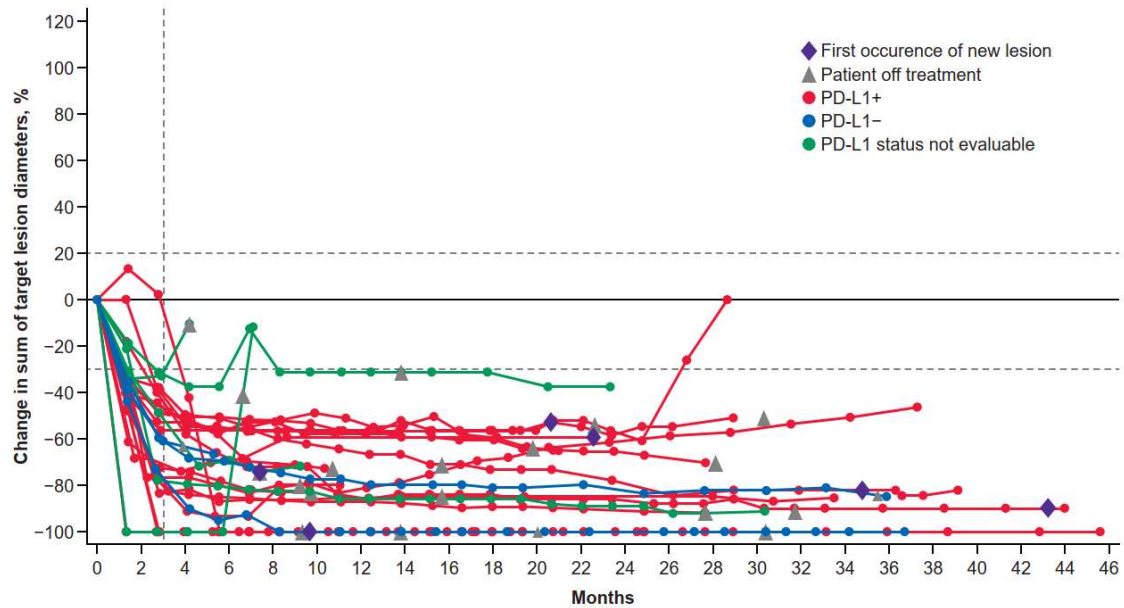

**Figure S4.** HLA gene expression in (A) MCC tumor samples and normal tissues; (B) genomic changes in MHC class I HLA genes from evaluable patients (n=29). The boxes represent interquartile ranges, and the horizontal lines are medians. The whiskers denote the lower and upper quartiles, and the circles represent data points. CN, copy number; CPM, counts per million; CR, complete response; GTEx, Genotype-Tissue Expression; LOH, loss of heterozygosity; MCC, Merkel cell carcinoma; MHC, major histocompatibility complex; NE, not evaluable; PD, progressive disease; PR, partial response; SD, stable disease; TPM, transcripts per kilobase per million.

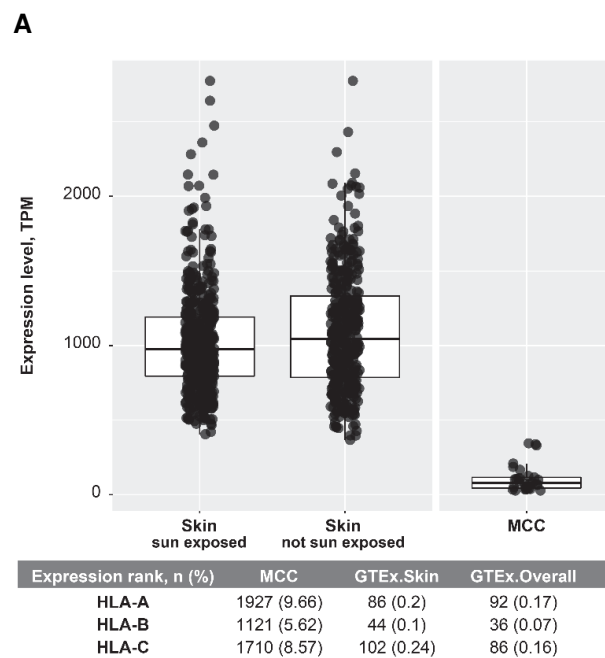

**B**

| Patient index | CN | LOH | CPM     | Response |
|---------------|----|-----|---------|----------|
| 1             | 3  |     | 15.16   | PR       |
| 2             | 3  | Yes | 32.77   | NE       |
| 3             | 2  |     | 34.96   | SD       |
| 4             | 2  | Yes | 46.01   | NE       |
| 5             | 4  |     | 47.86   | SD       |
| 6             | 2  |     | 48.96   | SD       |
| 7             | 2  | Yes | 69.2    | PD       |
| 8             | 2  |     | 71.05   | NE       |
| 9             | 2  |     | 82.76   | PD       |
| 10            | 3  |     | 121     | PR       |
| 11            | 2  |     | 140.22  | PD       |
| 12            | 2  |     | 156.88  | PD       |
| 13            | 2  |     | 157.7   | PD       |
| 14            | 2  | Yes | 160.83  | PD       |
| 15            | 2  |     | 170.15  | PD       |
| 16            | 2  |     | 182.03  | PD       |
| 17            | 2  |     | 229.94  | CR       |
| 18            | 2  |     | 233.74  | PD       |
| 19            | 2  |     | 236.49  | NE       |
| 20            | 3  | Yes | 267.41  | PD       |
| 21            | 2  |     | 282     | PD       |
| 22            | 2  |     | 308.44  | PR       |
| 23            | 2  |     | 311.39  | SD       |
| 24            | 4  |     | 347.03  | PR       |
| 25            | 0  |     | 379.35  | PD       |
| 26            | 3  | Yes | 545.24  | CR       |
| 27            | 2  |     | 765.3   | PR       |
| 28            | 2  |     | 1216.92 | PR       |
| 29            | 2  |     | 1225.24 | SD       |



**Figure S5.** Differential gene set enrichment and association with biomarker status and clinical response for (A) tumor necrosis factor  $\alpha$  signaling via NF- $\kappa$ B, (B) NK cell activation, (C) interferon  $\gamma$  response, and (D) P53 pathway. The boxes represent interquartile ranges, and the horizontal lines are medians. The whiskers denote the lower and upper quartiles, and the circles represent data points. MCPyV, Merkel cell polyomavirus; NF- $\kappa$ B, nuclear factor- $\kappa$ B; NK, natural killer; NR, nonresponders; PD-L1, programmed death-ligand 1; R, responders.

**A**

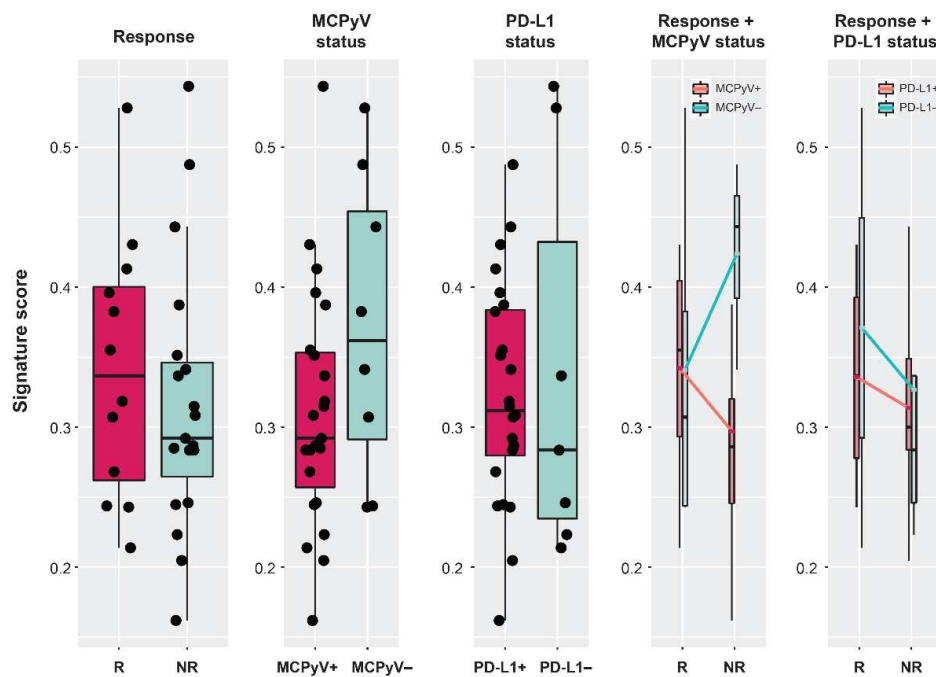

**B**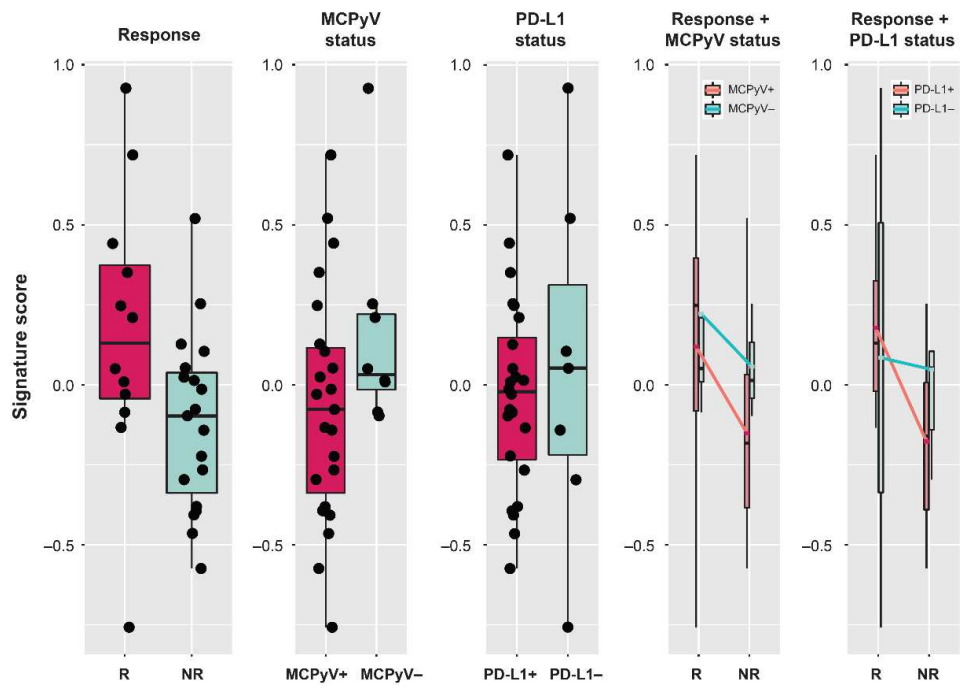

C

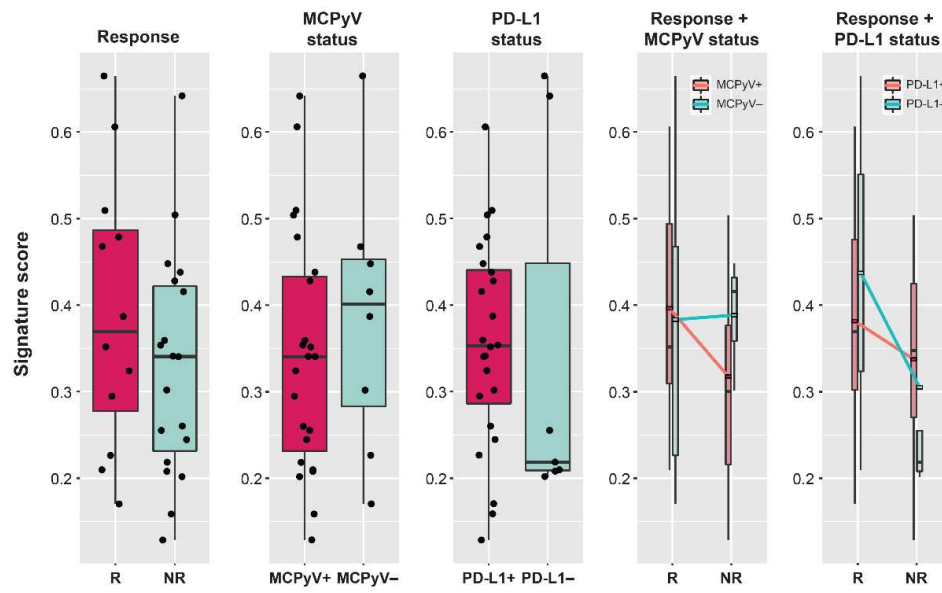

D

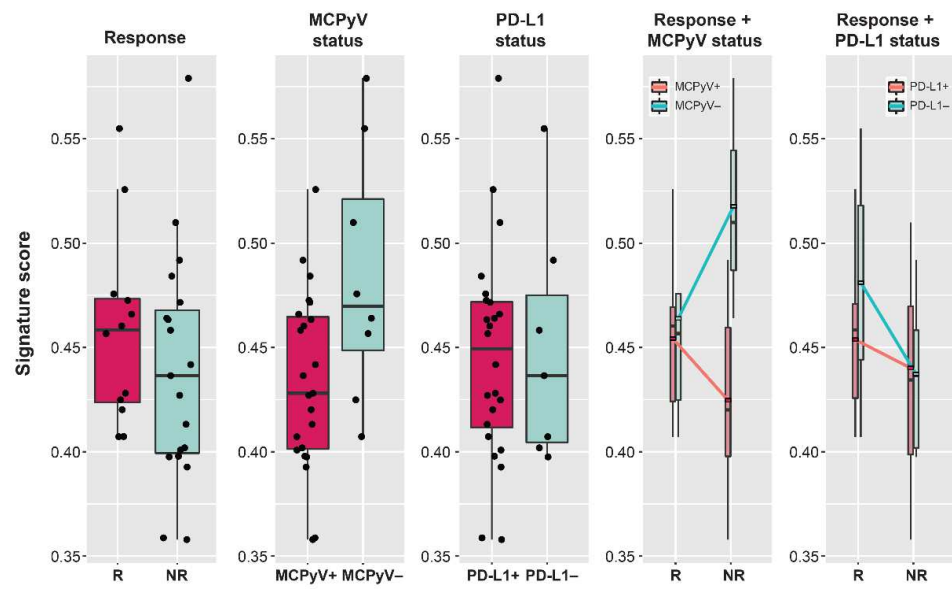

Supplement: jitc-2020-000674supp001.pdf [file jitc-2020-000674supp001.pdf]
